# Supplementary material for: Does Parental Migration During Childhood Affect Children's Lifetime Educational Attainment? Evidence From Mexico
Source: Oxford University Press journal article supplement (doi:10.1215/00703370-9411336), 2021-09-03
Supplement: wassink_esm.pdf [file wassink_esm.pdf]

## Online Appendix

### Section A

Table A1. Logit model predicting migration of the household head in year t+1

| <i>Variable name</i>                              | Beta     | (SE)    |     |
|---------------------------------------------------|----------|---------|-----|
| Age                                               | 0.059    | (0.021) | **  |
| Age-squared                                       | -0.005   | (0.001) | *** |
| Sex                                               | -0.029   | (0.043) |     |
| <i>Household head characteristics</i>             |          |         |     |
| Year born                                         | 0.078    | (0.004) | *** |
| Sex=Male                                          | 1.096    | (0.097) | *** |
| Married                                           | 0.307    | (0.077) | *** |
| Years of school                                   | -0.040   | (0.007) | *** |
| Has domestic migration experience                 | 0.370    | (0.048) | *** |
| <i>Occupation of the household head</i>           |          |         |     |
| Agricultural                                      | 0.610    | (0.081) | *** |
| Unskilled                                         | 0.318    | (0.077) | *** |
| Skilled/professional                              | -0.416   | (0.151) | **  |
| <i>Household context</i>                          |          |         |     |
| Minors                                            | 0.079    | (0.017) | *** |
| Adults                                            | 0.100    | (0.038) | **  |
| Sibling rank                                      | -0.071   | (0.022) | **  |
| Land                                              | -0.388   | (0.060) | *** |
| Property                                          | -0.420   | (0.044) | *** |
| Business                                          | -0.489   | (0.080) | *** |
| <i>Migration experience of the household head</i> |          |         |     |
| Parent has migrated                               | 0.540    | (0.087) | *** |
| Brother has migrated                              | 0.144    | (0.027) | *** |
| Sister has migrated                               | 0.064    | (0.053) |     |
| Constant                                          | -158.200 | (8.593) | *** |
| Year fixed effects                                |          | Yes     |     |
| Child-years                                       | 543,298  |         |     |

\* p<0.05, \*\* p<0.01, \*\*\* p<0.001

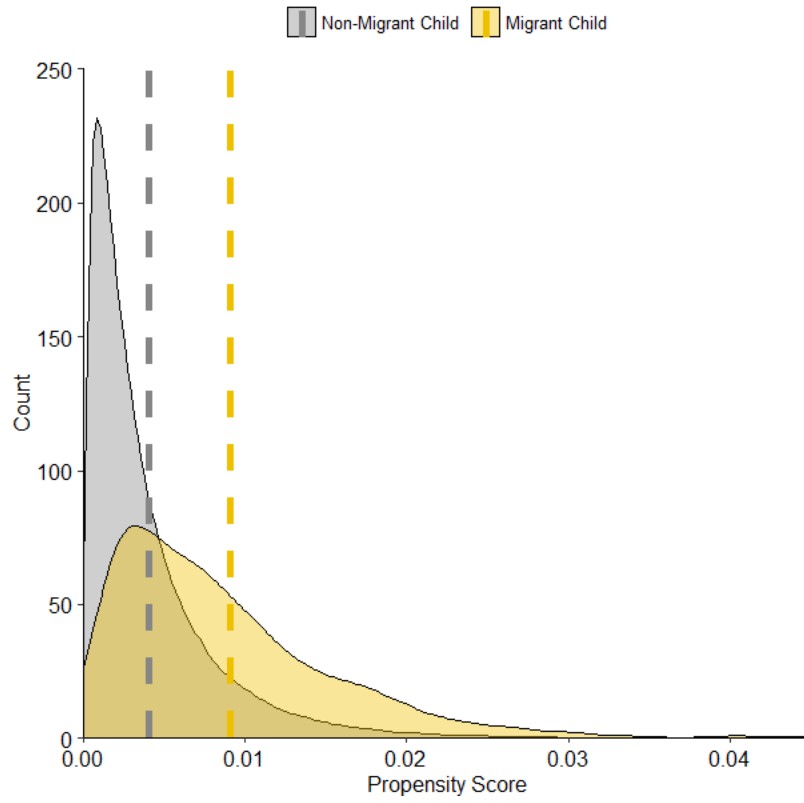

**Fig. A1** Density distribution of propensity scores among migrant and non-migrant children.

Table A2. Covariate balance pre- and post-matching

| Variable                                          | Mean    |         |           | Treated- | Treated-  |
|---------------------------------------------------|---------|---------|-----------|----------|-----------|
|                                                   | Treated | Control | Unmatched | control  | unmatched |
|                                                   |         |         |           | %bias    | %bias     |
| <i>Child characteristics</i>                      |         |         |           |          |           |
| Age                                               | 5.70    | 5.75    | 6.91      | -1.3%    | -30.1%    |
| Age-squared                                       | 48.35   | 49.50   | 66.18     | -2.0%    | -32.0%    |
| Sibling rank                                      | 2.98    | 3.07    | 3.69      | -4%      | -0.302    |
| Sex                                               | 0.50    | 0.50    | 0.50      | -0.9%    | -0.8%     |
| <i>Household head characteristics</i>             |         |         |           |          |           |
| Year born                                         | 1949    | 1947    | 1945      | 14.4%    | 32.5%     |
| Sex=Male                                          | 0.93    | 0.93    | 0.82      | 1.0%     | 36.3%     |
| Married                                           | 0.91    | 0.93    | 0.88      | -5.0%    | 11.6%     |
| Years of school                                   | 4.12    | 3.85    | 4.46      | 7.5%     | -10.0%    |
| Has domestic migration experience                 | 0.31    | 0.33    | 0.26      | -5.2%    | 10.1%     |
| <i>Occupation of the household head</i>           |         |         |           |          |           |
| Agricultural                                      | 0.49    | 0.53    | 0.38      | -6.5%    | 23.8%     |
| Unskilled                                         | 0.36    | 0.33    | 0.33      | 6.2%     | 4.5%      |
| Skilled/professional                              | 0.02    | 0.02    | 0.05      | 1.2%     | -11.2%    |
| <i>Household context</i>                          |         |         |           |          |           |
| Minors                                            | 4.40    | 4.47    | 4.65      | -3.0%    | -10.6%    |
| Adults                                            | 0.23    | 0.26    | 0.62      | -2.3%    | -32.9%    |
| Land                                              | 0.14    | 0.14    | 0.21      | -1.5%    | -17.1%    |
| Property                                          | 0.45    | 0.43    | 0.62      | 3.6%     | -33.7%    |
| Business                                          | 0.07    | 0.09    | 0.14      | -3.2%    | -20.3%    |
| <i>Migration experience of the household head</i> |         |         |           |          |           |
| Parent has migrated                               | 0.08    | 0.09    | 0.04      | -5.5%    | 16.2%     |
| Brother has migrated                              | 0.29    | 0.40    | 0.20      | -15.0%   | 13.4%     |
| Sister has migrated                               | 0.08    | 0.08    | 0.06      | -2.5%    | 5.1%      |
| Mean %bias                                        |         |         |           | 4.4%     | 19.1%     |
| %Bias reduction                                   |         |         |           | 77%      |           |

## Section B

Table B1. Average treatment effects of parental migration on children's educational attainment by sex

| Outcome                   | Treated | Controls | ATT  | S.E. | Z-score |     |
|---------------------------|---------|----------|------|------|---------|-----|
| A. Men                    |         |          |      |      |         |     |
| Years                     | 8.76    | 8.31     | 0.45 | 0.15 | 2.98    | **  |
| Completed lower secondary | 61%     | 55%      | 5%   | 1.9% | 2.89    | **  |
| Began upper secondary     | 28%     | 25%      | 3%   | 1.7% | 2.07    | *   |
| Completed upper secondary | 25%     | 21%      | 4%   | 1.6% | 2.22    | *   |
| Observations              | 1,110   | 1,110    |      |      |         |     |
| -----                     |         |          |      |      |         |     |
| B. Women                  |         |          |      |      |         |     |
| Years                     | 9.14    | 8.65     | 0.49 | 0.15 | 3.34    | *** |
| Completed lower secondary | 64%     | 57%      | 7%   | 1.8% | 4.01    | *** |
| Began upper secondary     | 33%     | 30%      | 3%   | 1.7% | 1.73    |     |
| Completed upper secondary | 30%     | 26%      | 4%   | 1.7% | 2.12    | *   |
| Observations              | 1,112   | 1,112    |      |      |         |     |

\* p<0.05, \*\* p<0.01, \*\*\* p<0.001

Table B2. Average treatment effects of parental migration on children's educational attainment with multiple matched controls

| Outcome                   | Treated | Controls | ATT  | S.E. | Z-score |     |
|---------------------------|---------|----------|------|------|---------|-----|
| A. Neighbors = 3          |         |          |      |      |         |     |
| Years                     | 8.95    | 8.59     | 0.36 | 0.07 | 4.96    | *** |
| Completed lower secondary | 62%     | 57%      | 6%   | 1.0% | 5.85    | *** |
| Began upper secondary     | 30%     | 28%      | 2%   | 0.9% | 2.33    | *   |
| Completed upper secondary | 27%     | 25%      | 2%   | 0.9% | 2.44    | *   |
| Observations              | 2,225   | 6,384    |      |      |         |     |
| -----                     |         |          |      |      |         |     |
| B. Neighbors = 5          |         |          |      |      |         |     |
| Years                     | 8.95    | 8.56     | 0.39 | 0.07 | 5.72    | *** |
| Completed lower secondary | 62%     | 56%      | 6%   | 0.9% | 6.85    | *** |
| Began upper secondary     | 30%     | 28%      | 3%   | 0.9% | 2.85    | **  |
| Completed upper secondary | 27%     | 25%      | 2%   | 0.9% | 2.73    | **  |
| Observations              | 2,225   | 10,388   |      |      |         |     |

\* p<0.05, \*\* p<0.01, \*\*\* p<0.001

Table B3. Average treatment effects of parental migration on children's educational attainment with alternative sample restrictions

| Outcome                                                                                          | Treated | Controls | ATT  | S.E. | Z-score |     |
|--------------------------------------------------------------------------------------------------|---------|----------|------|------|---------|-----|
| A. No Migrant brothers of the household head                                                     |         |          |      |      |         |     |
| Years                                                                                            | 9.01    | 8.56     | 0.44 | 0.12 | 3.67    | *** |
| Completed lower secondary                                                                        | 63%     | 56%      | 7%   | 1.6% | 4.50    | *** |
| Began upper secondary                                                                            | 31%     | 27%      | 4%   | 1.5% | 2.59    | *   |
| Completed upper secondary                                                                        | 28%     | 24%      | 4%   | 1.5% | 2.75    | *   |
| Observations                                                                                     | 1,822   | 1,822    |      |      |         |     |
| -----                                                                                            |         |          |      |      |         |     |
| B. Excludes households surveyed in the United States                                             |         |          |      |      |         |     |
| Years                                                                                            | 8.81    | 8.47     | 0.34 | 0.11 | 3.02    | *** |
| Completed lower secondary                                                                        | 61%     | 55%      | 6%   | 1.5% | 3.73    | *** |
| Began upper secondary                                                                            | 28%     | 27%      | 2%   | 1.4% | 1.08    |     |
| Completed upper secondary                                                                        | 25%     | 23%      | 2%   | 1.3% | 1.49    |     |
| Observations                                                                                     | 2,064   | 2,064    |      |      |         |     |
| -----                                                                                            |         |          |      |      |         |     |
| C. Restricted to children of the household head aged 25 years or older at the time of the survey |         |          |      |      |         |     |
| Years                                                                                            | 8.98    | 8.54     | 0.44 | 0.14 | 3.2     | *** |
| Completed lower secondary                                                                        | 60%     | 55%      | 5%   | 1.7% | 2.69    | *** |
| Began upper secondary                                                                            | 29%     | 26%      | 3%   | 1.6% | 2.18    | *   |
| Completed upper secondary                                                                        | 27%     | 23%      | 4%   | 1.5% | 2.63    | **  |
| Some college                                                                                     | 12%     | 10%      | 2%   | 1.1% | 2.18    | *   |
| Completed college                                                                                | 10%     | 8%       | 2%   | 1.0% | 2.06    | *   |
| Observations                                                                                     | 1,246   | 1,246    |      |      |         |     |

\* p<0.05, \*\* p<0.01, \*\*\* p<0.001
